# Supplementary material
Source: PubMed Central journal article supplement (PMC11337673)
Supplement: bmjopen-2021-056636supp001.pdf [file bmjopen-2021-056636supp001.pdf]

Appendix A: Cases Age Groups

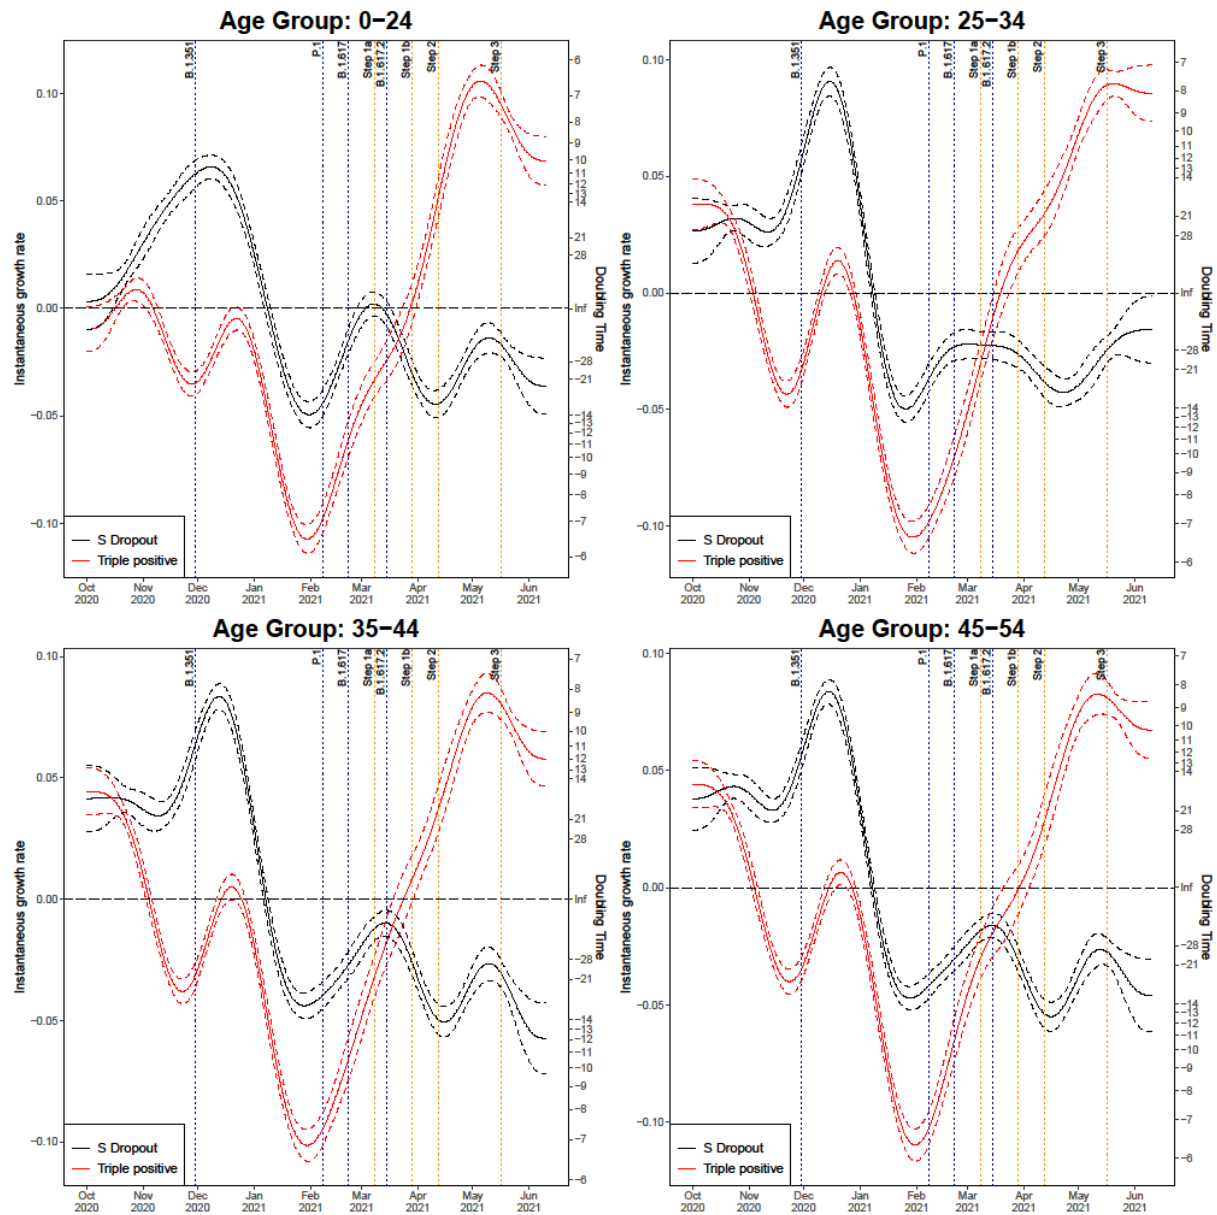

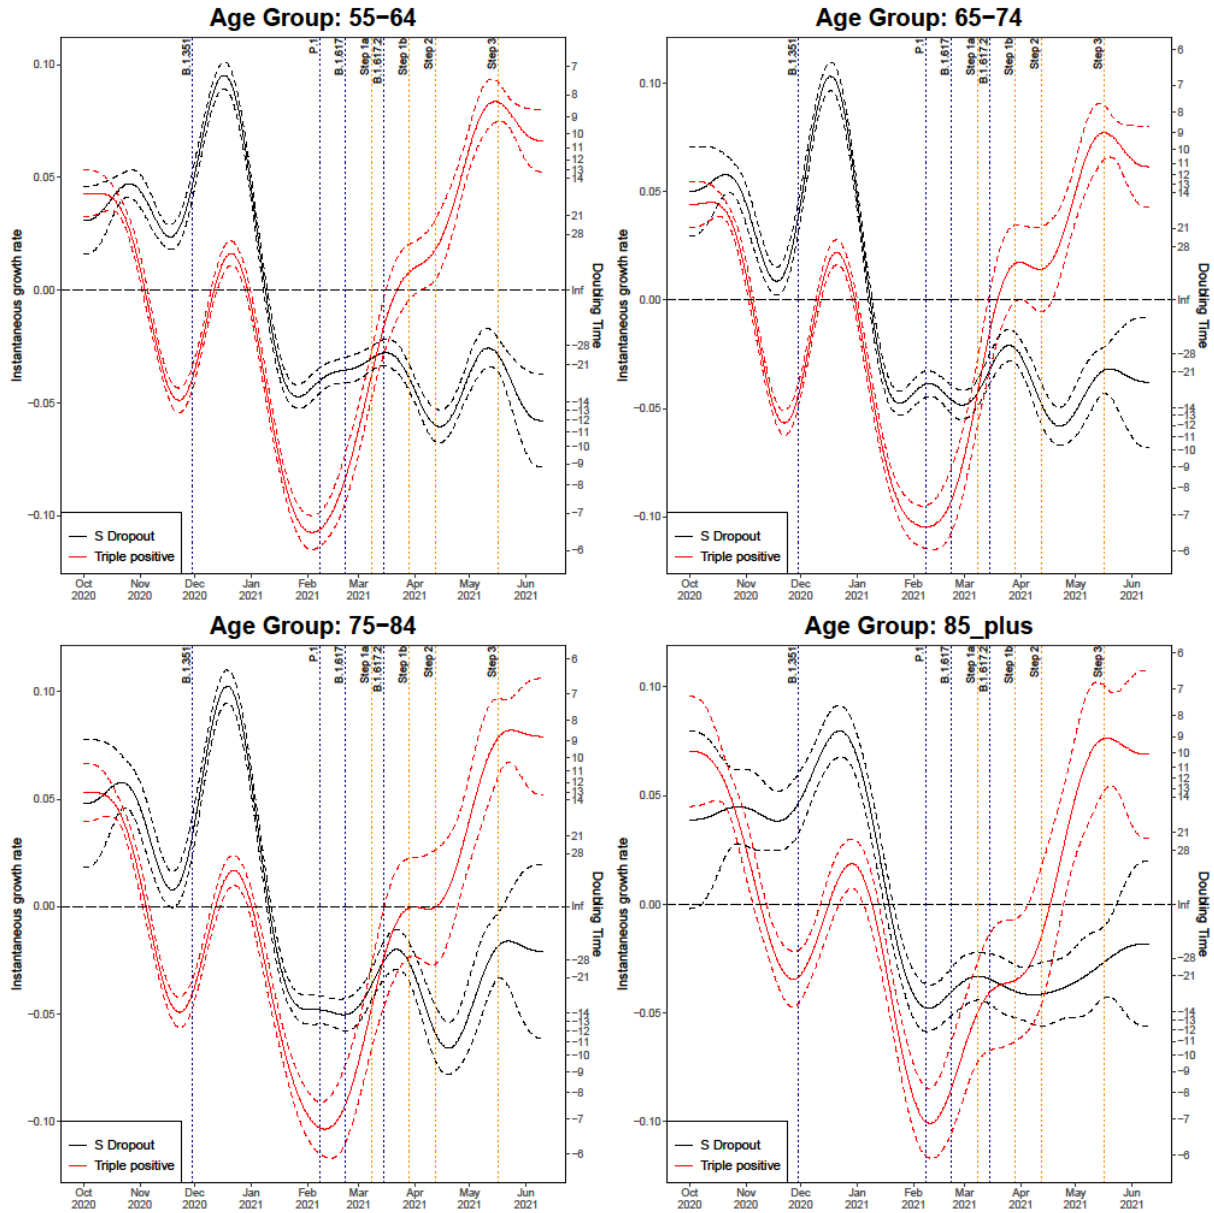

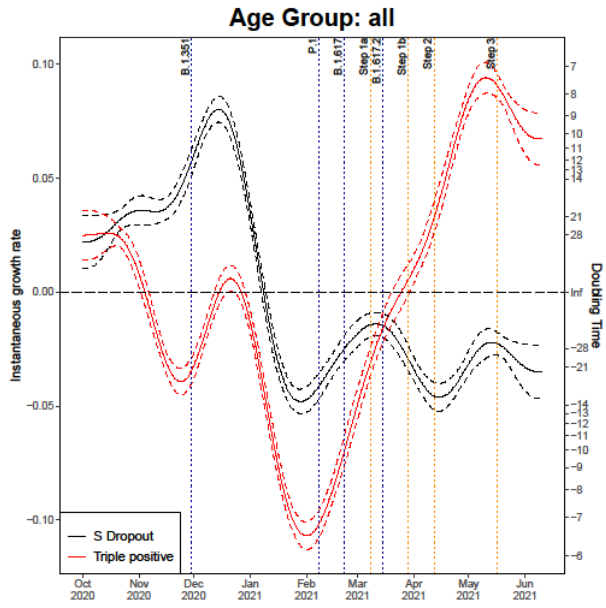

Appendix B: Cases Regions

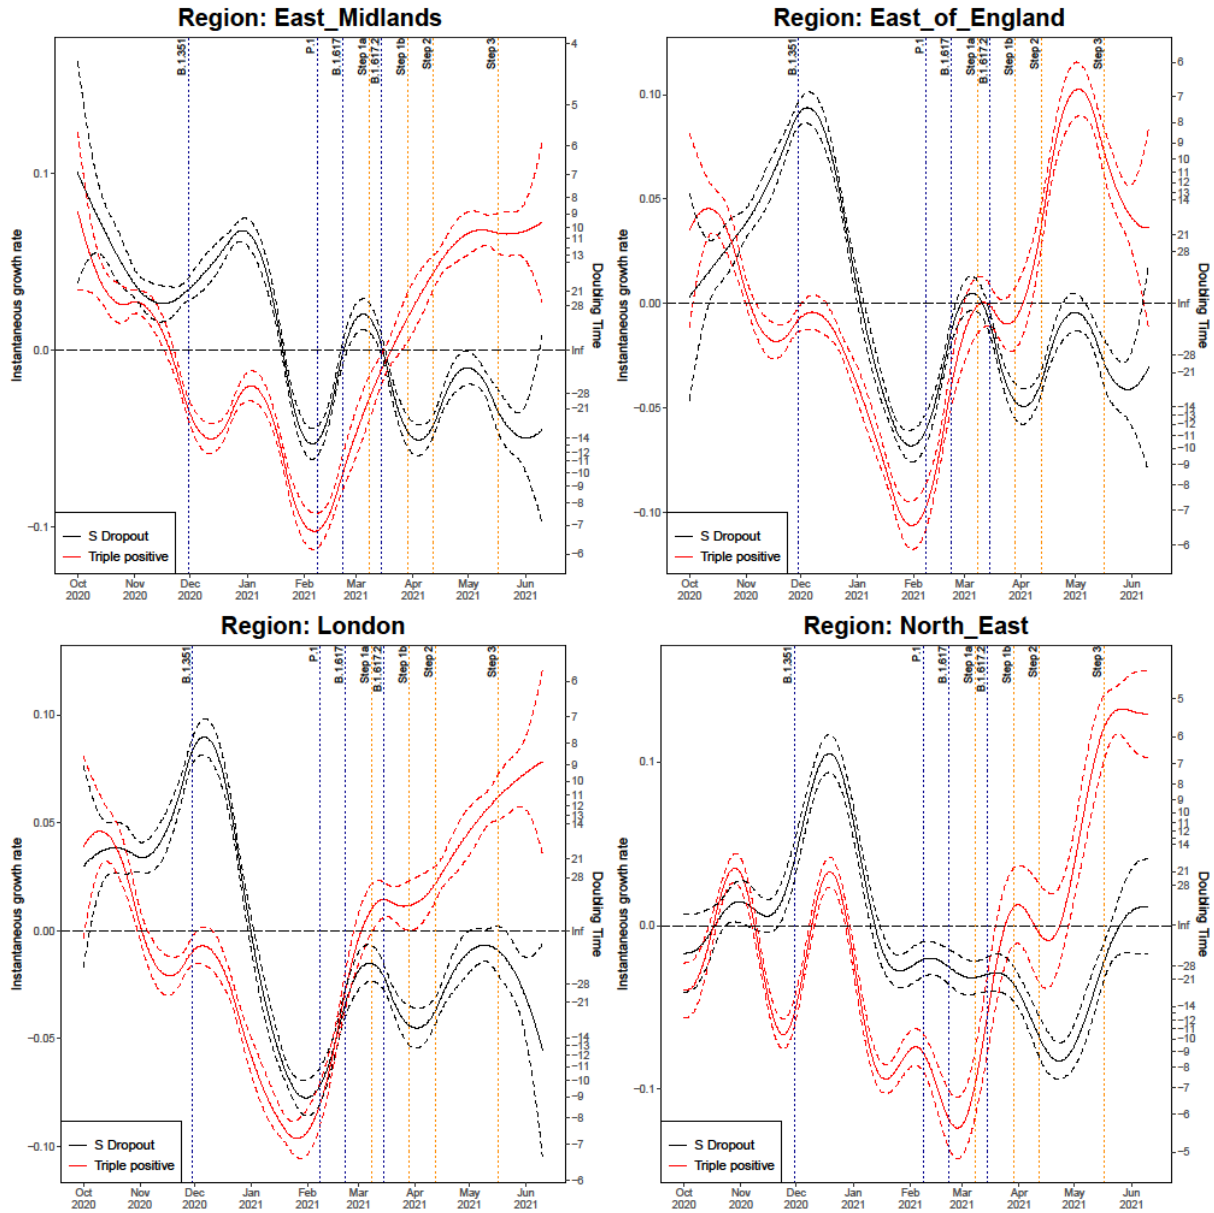

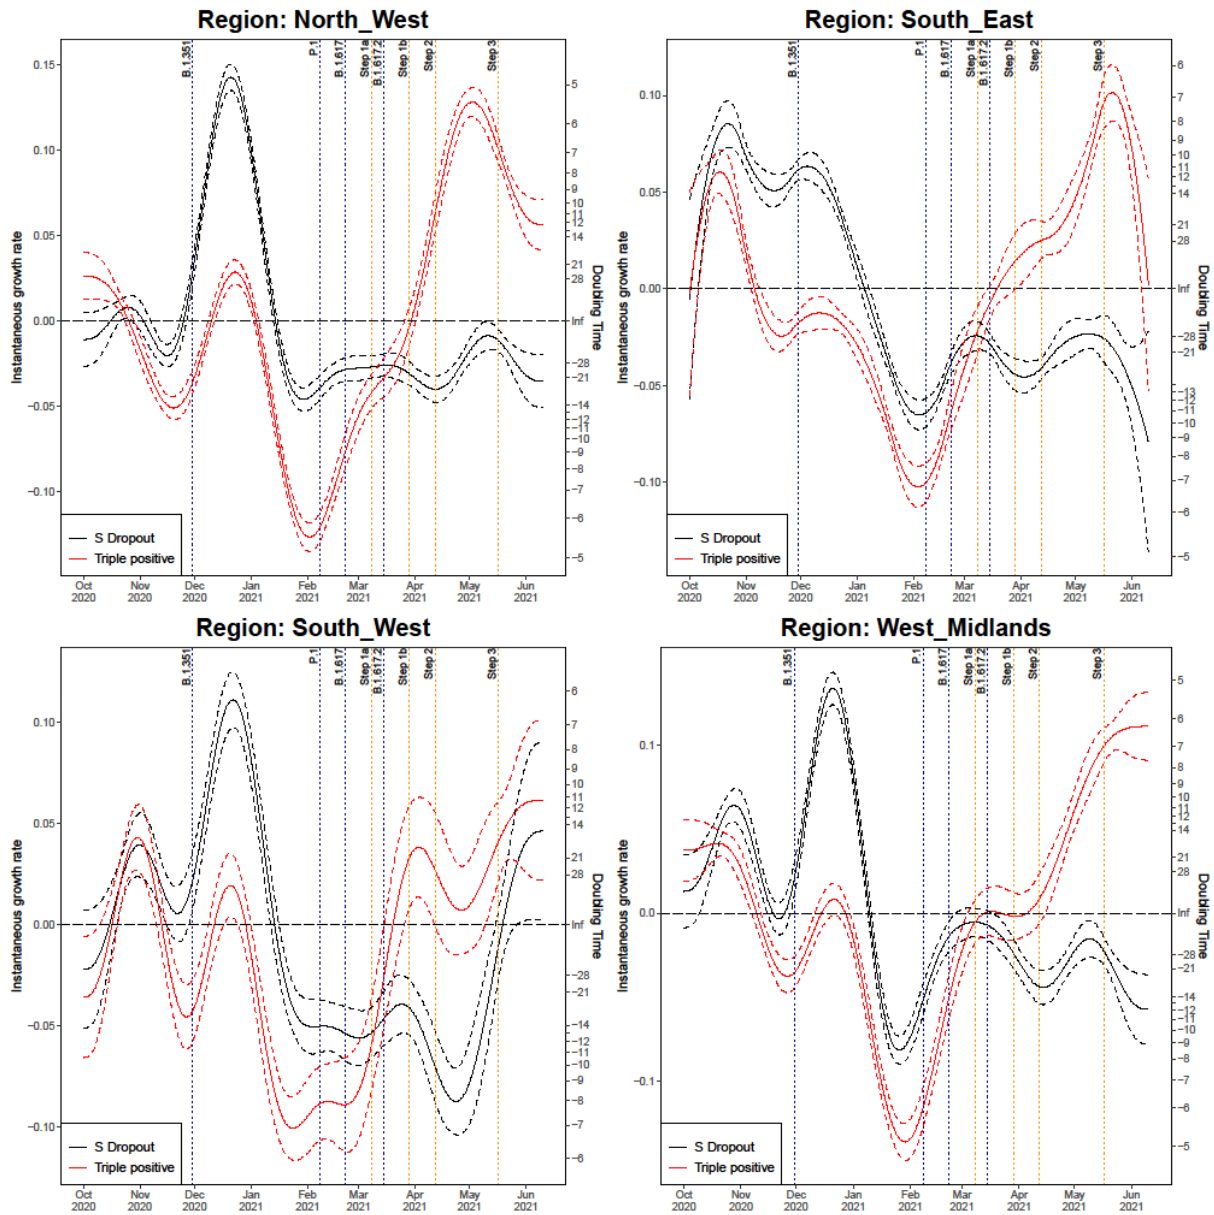

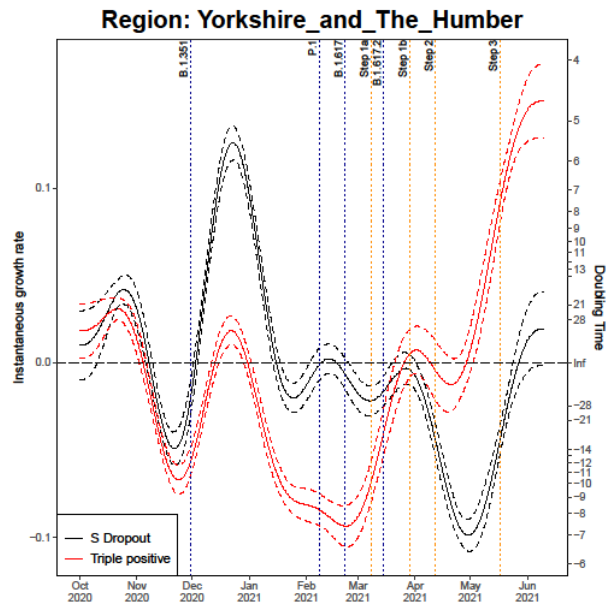

**Appendix C: Cases Ethnicity**

**Ethnicity: Black\_African\_Caribbean\_Black\_British**

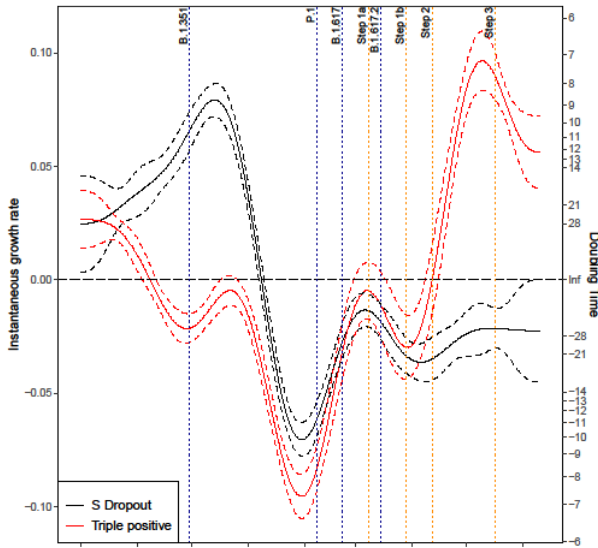

**Ethnicity: Indian**

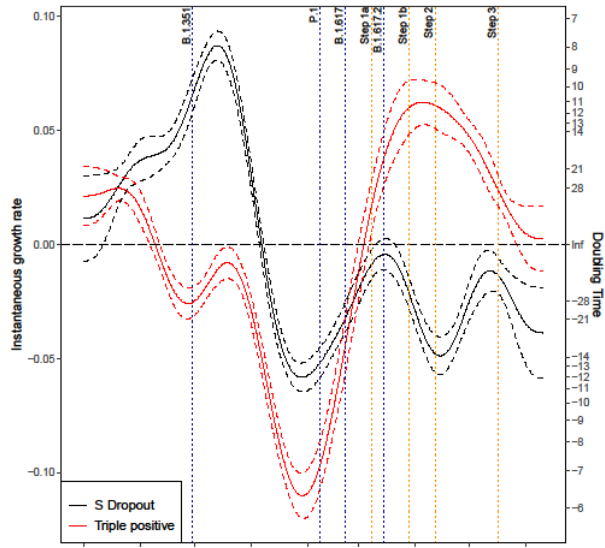

**Ethnicity: Mixed\_Multiple\_Ethnic\_Groups**

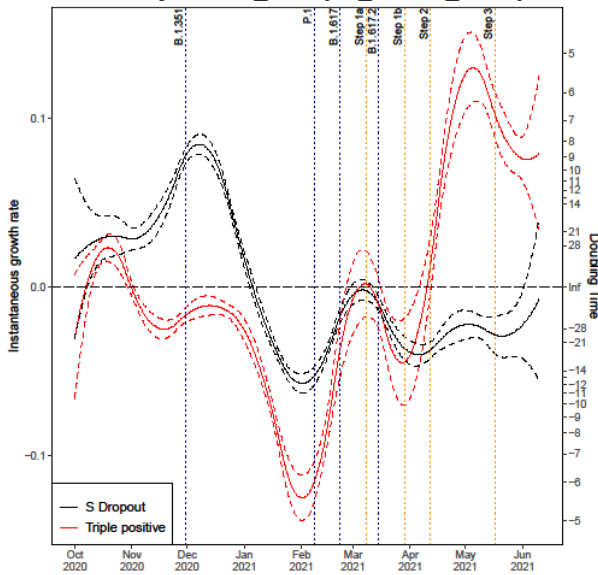

**Ethnicity: Other\_Asian**

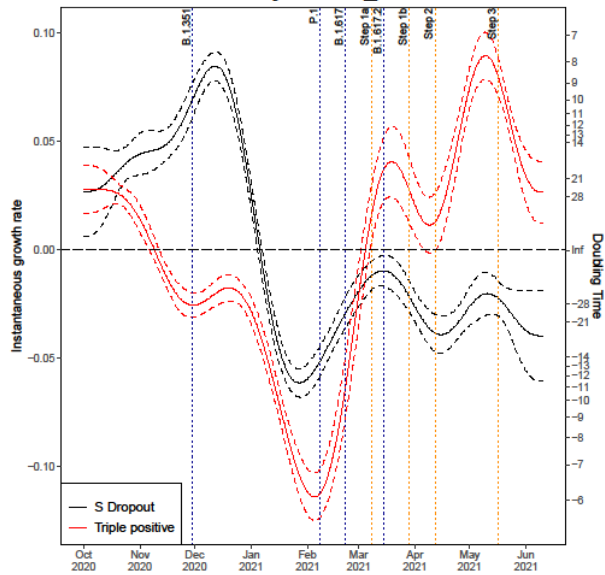

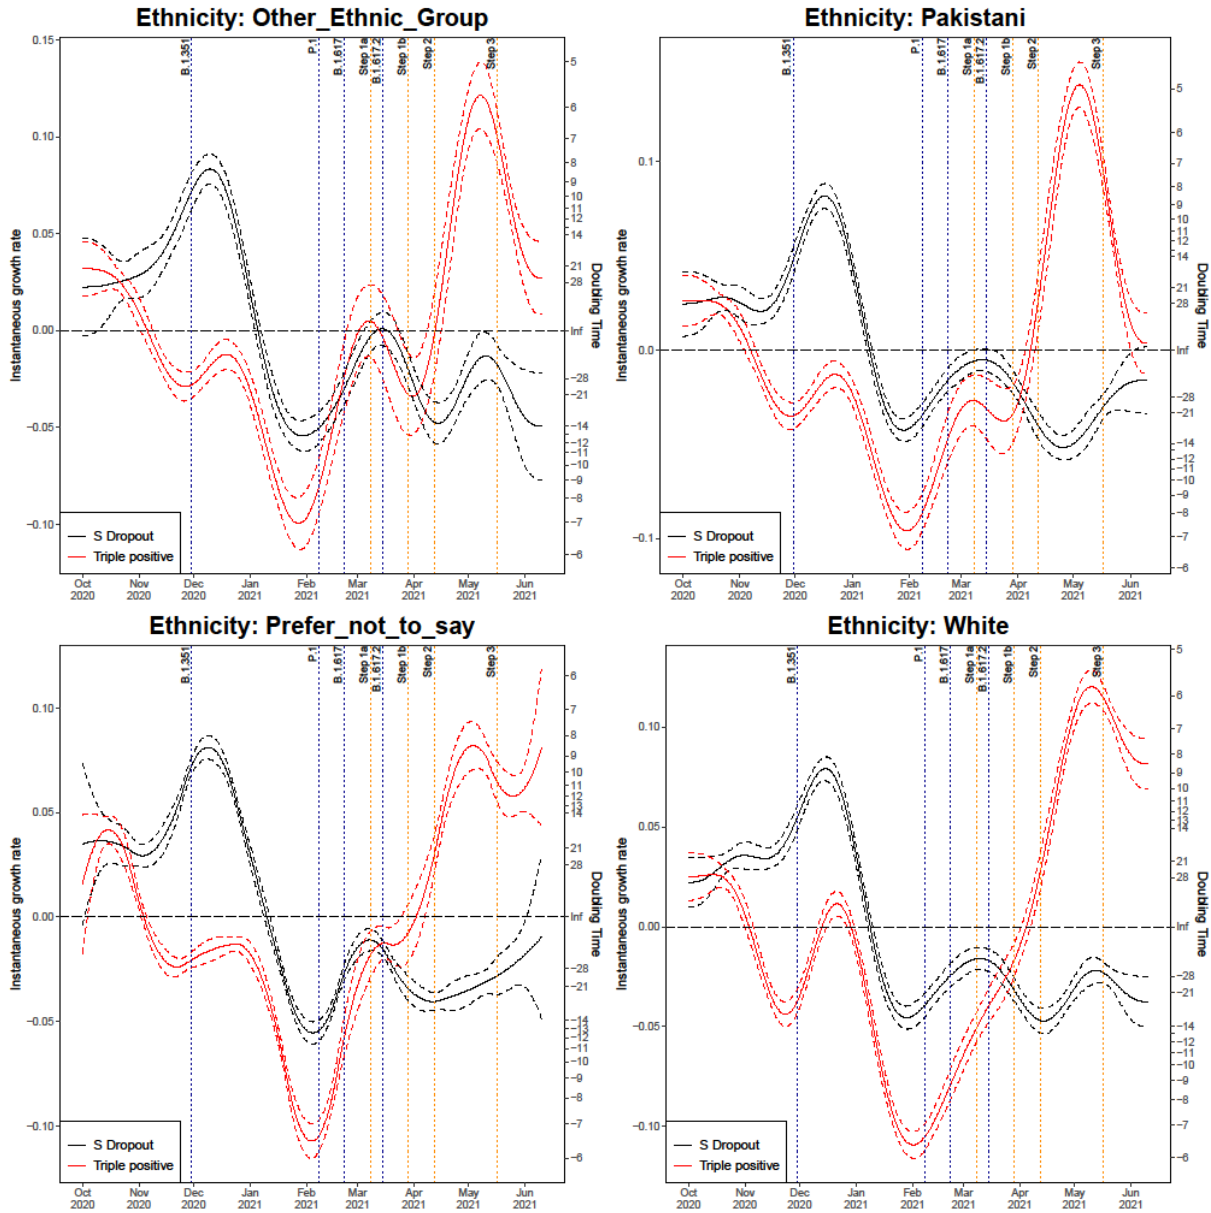

Appendix D: Cases LTLA



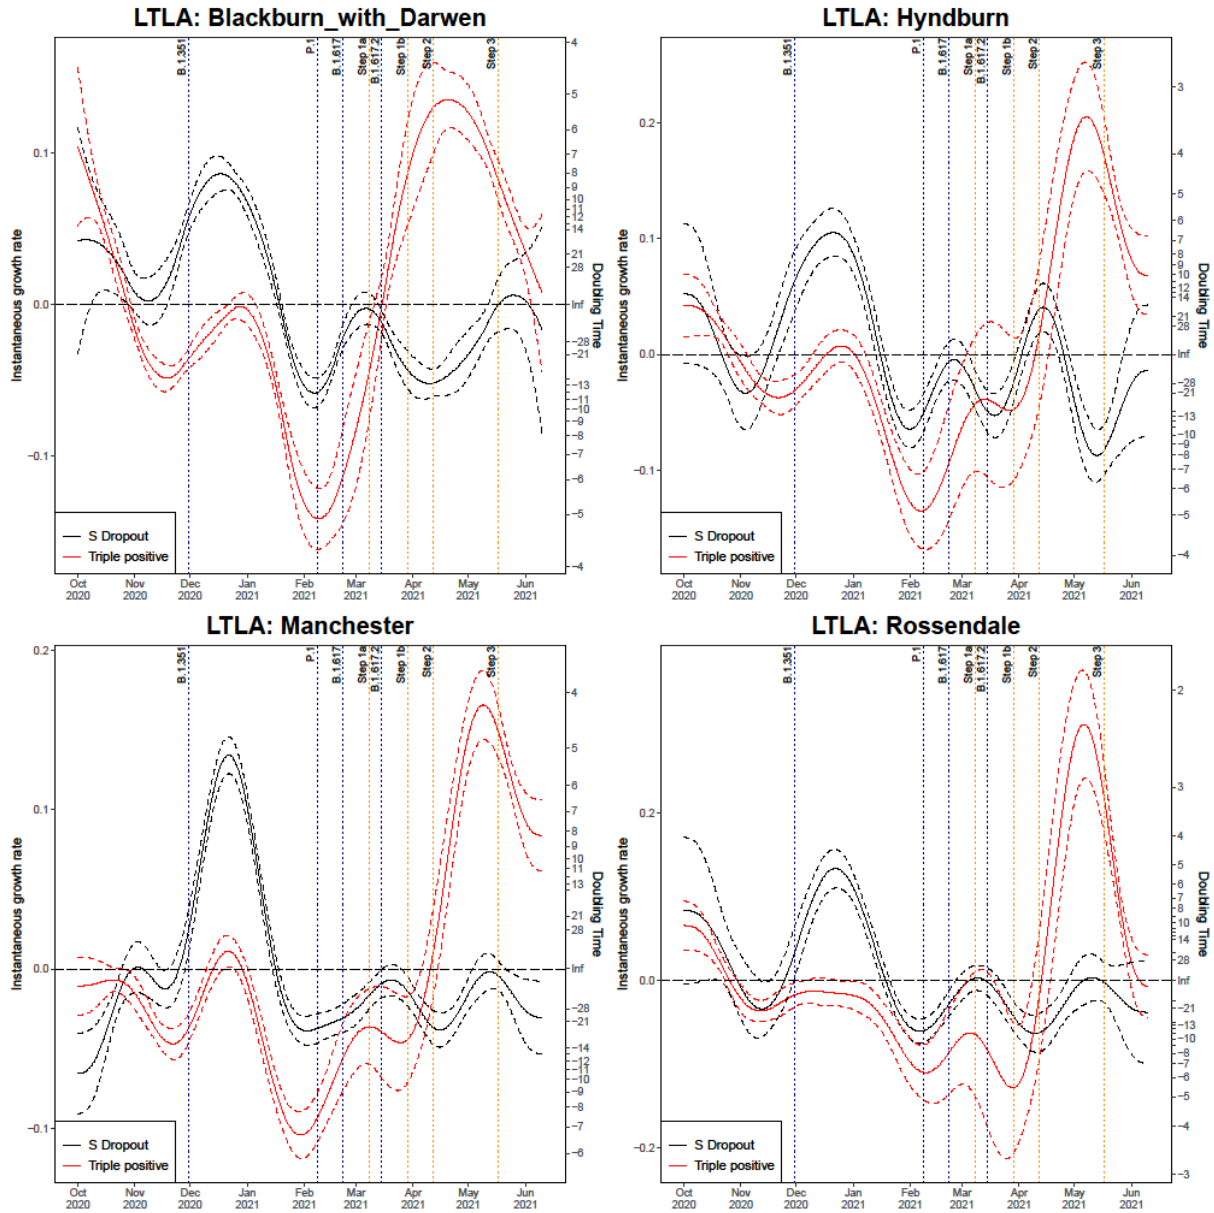

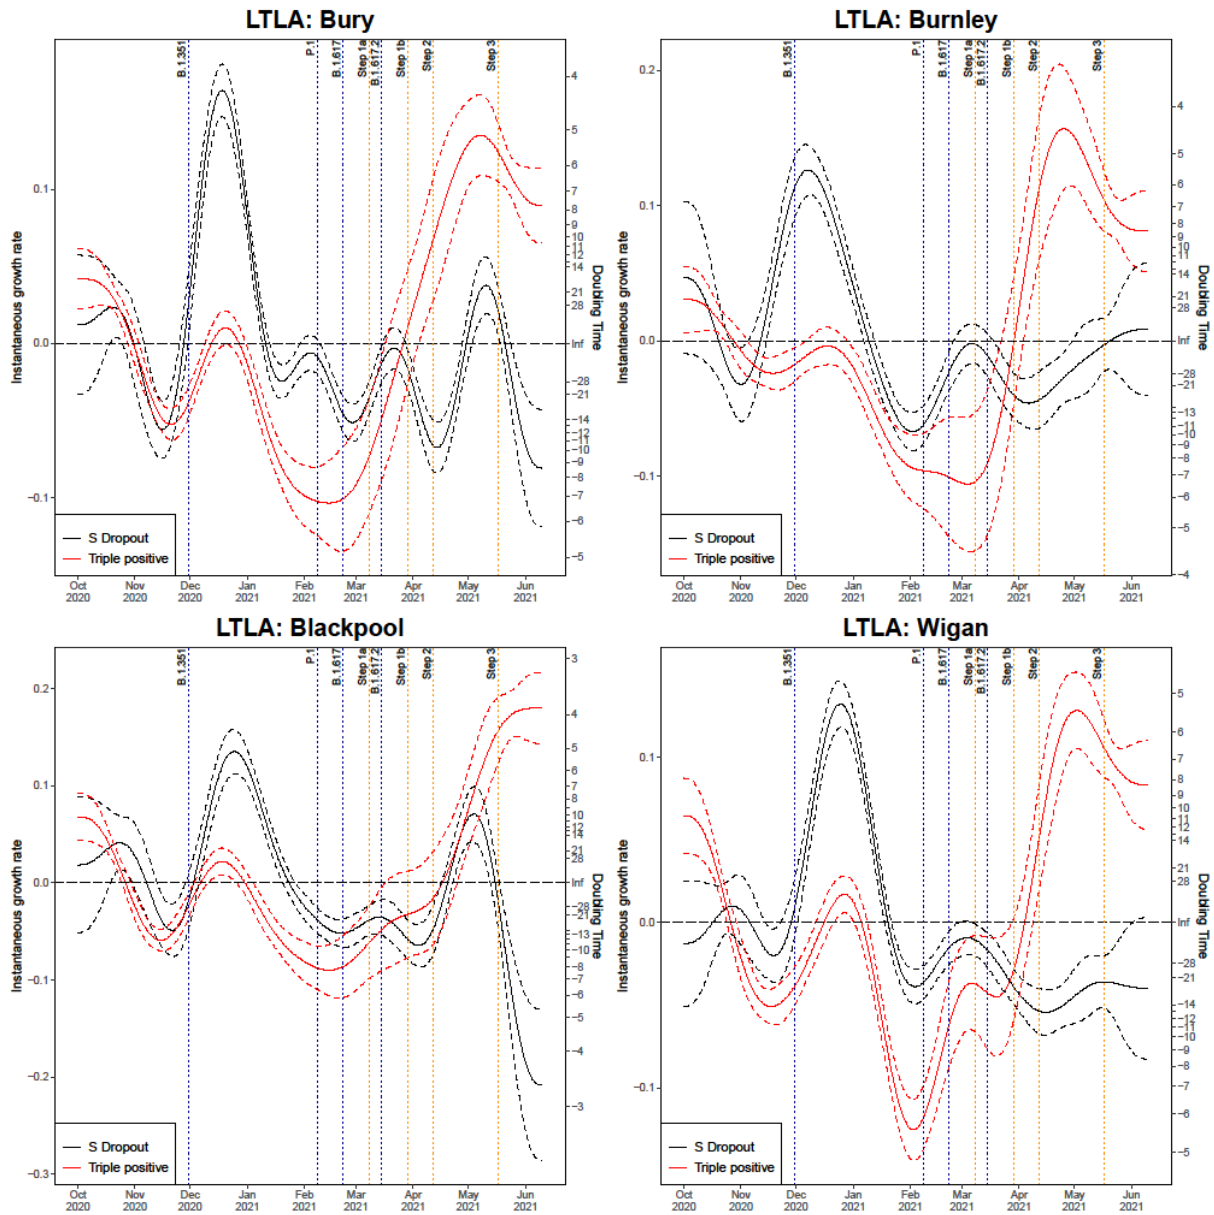

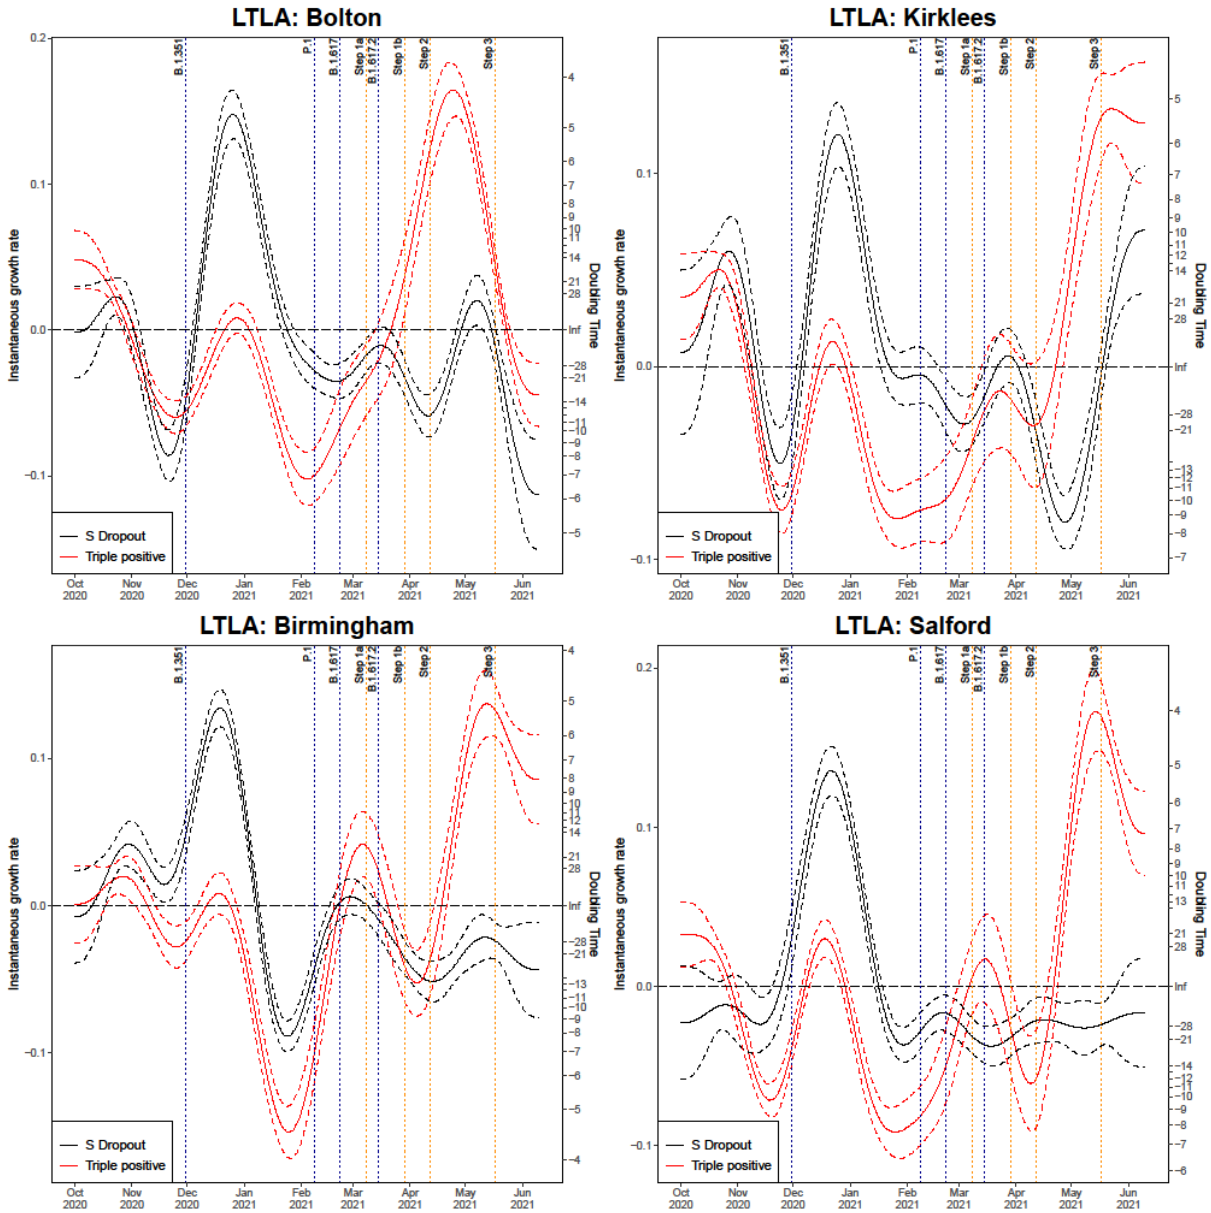

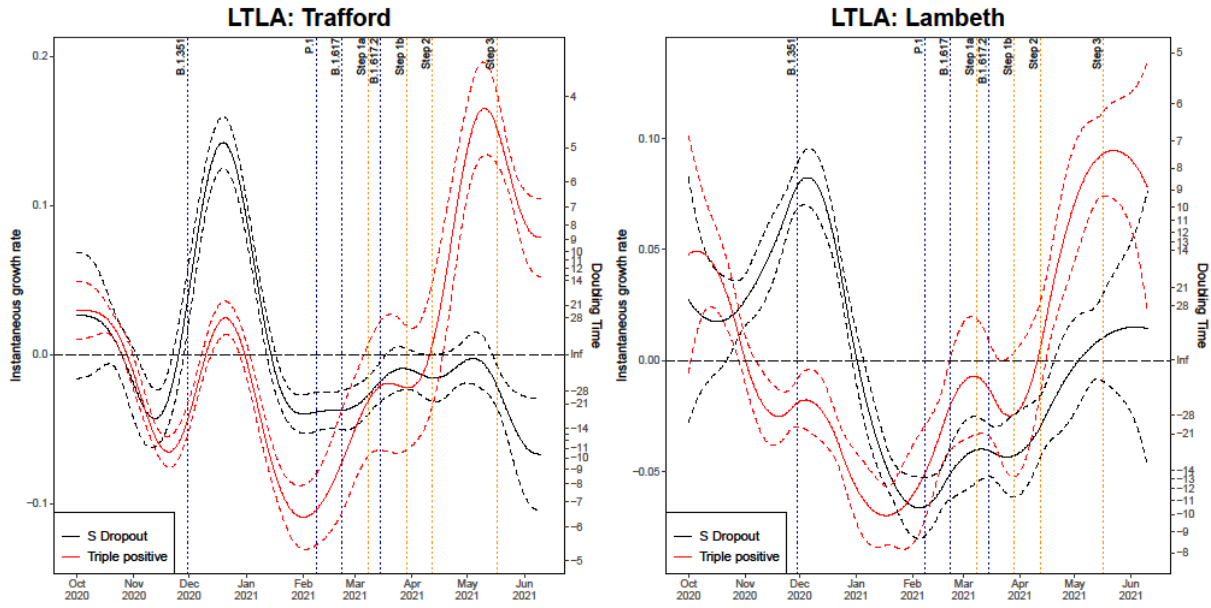

**Appendix E: Hospitalisation Age Groups**

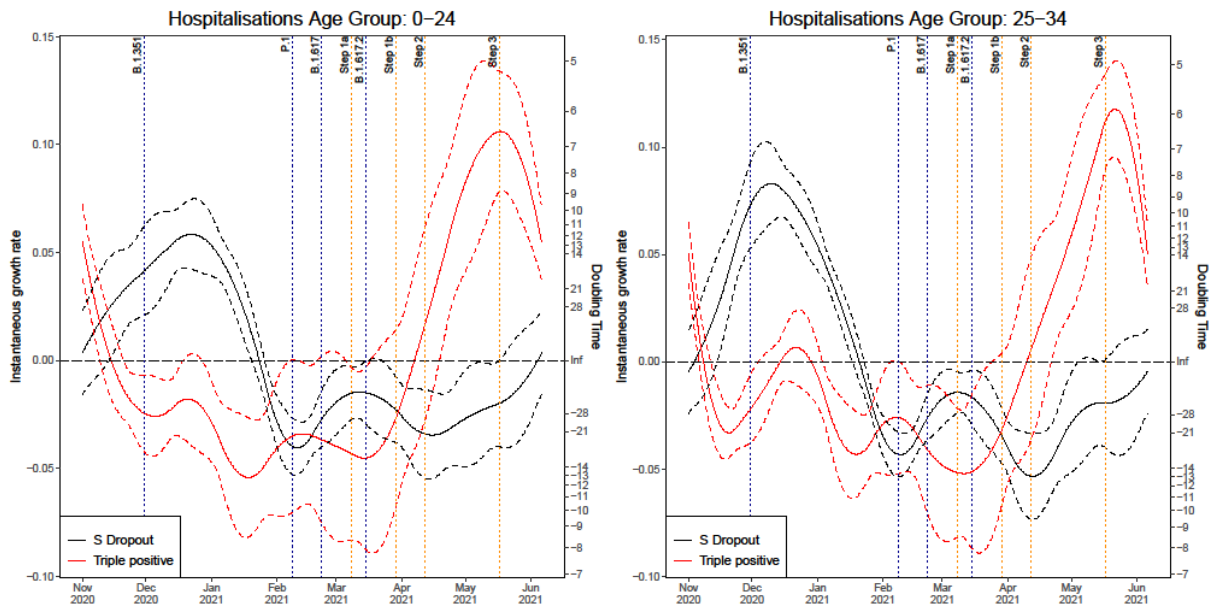

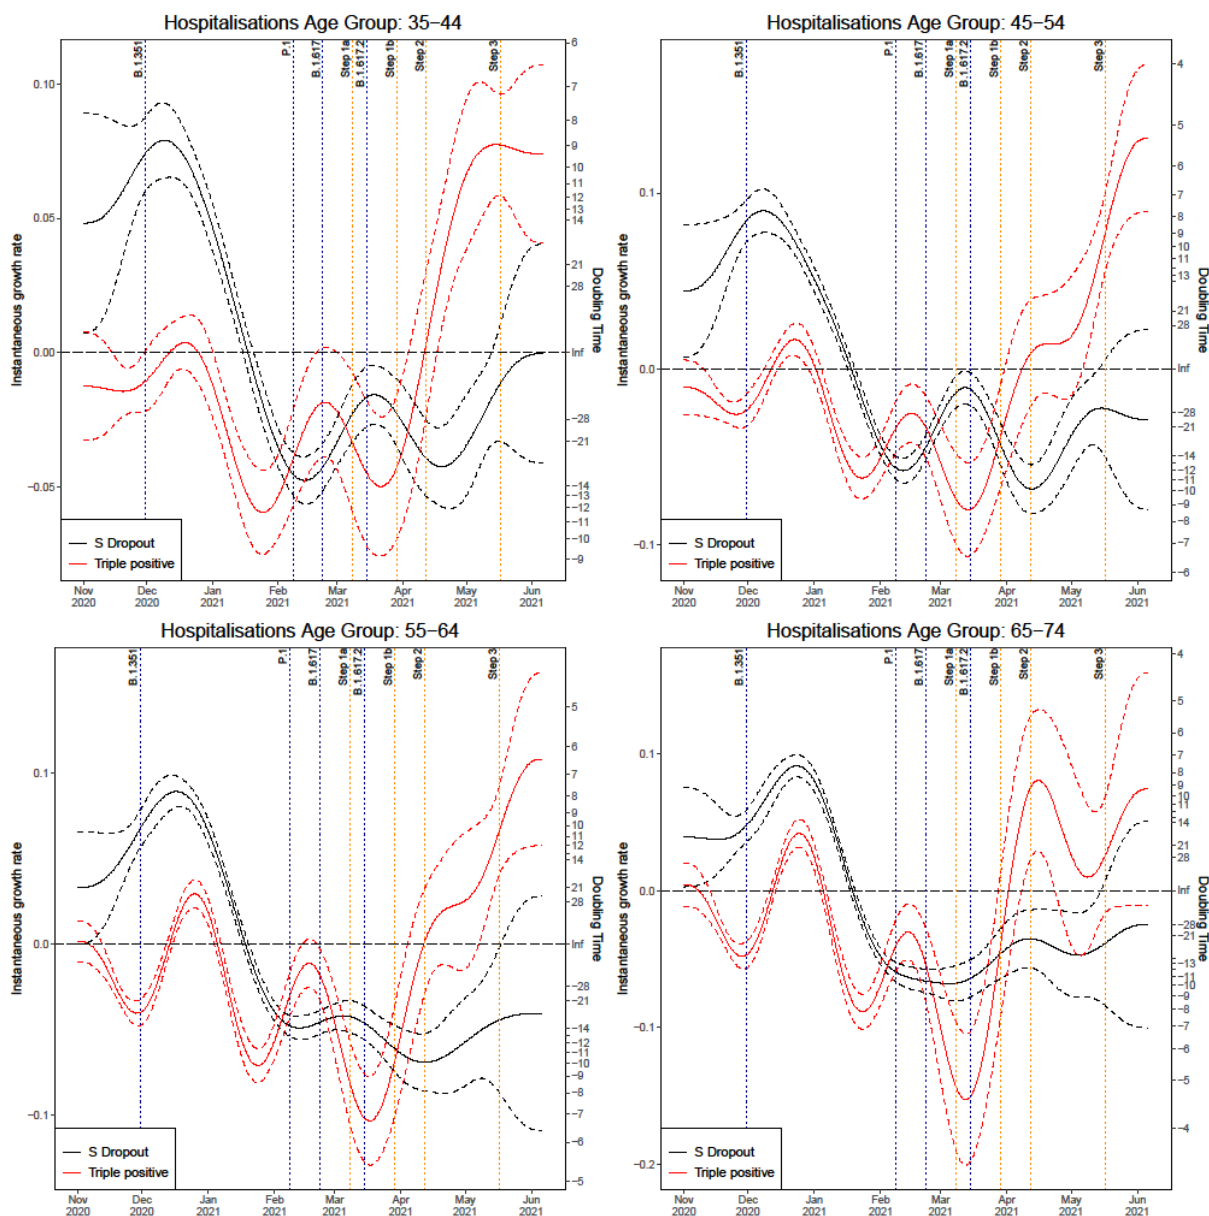

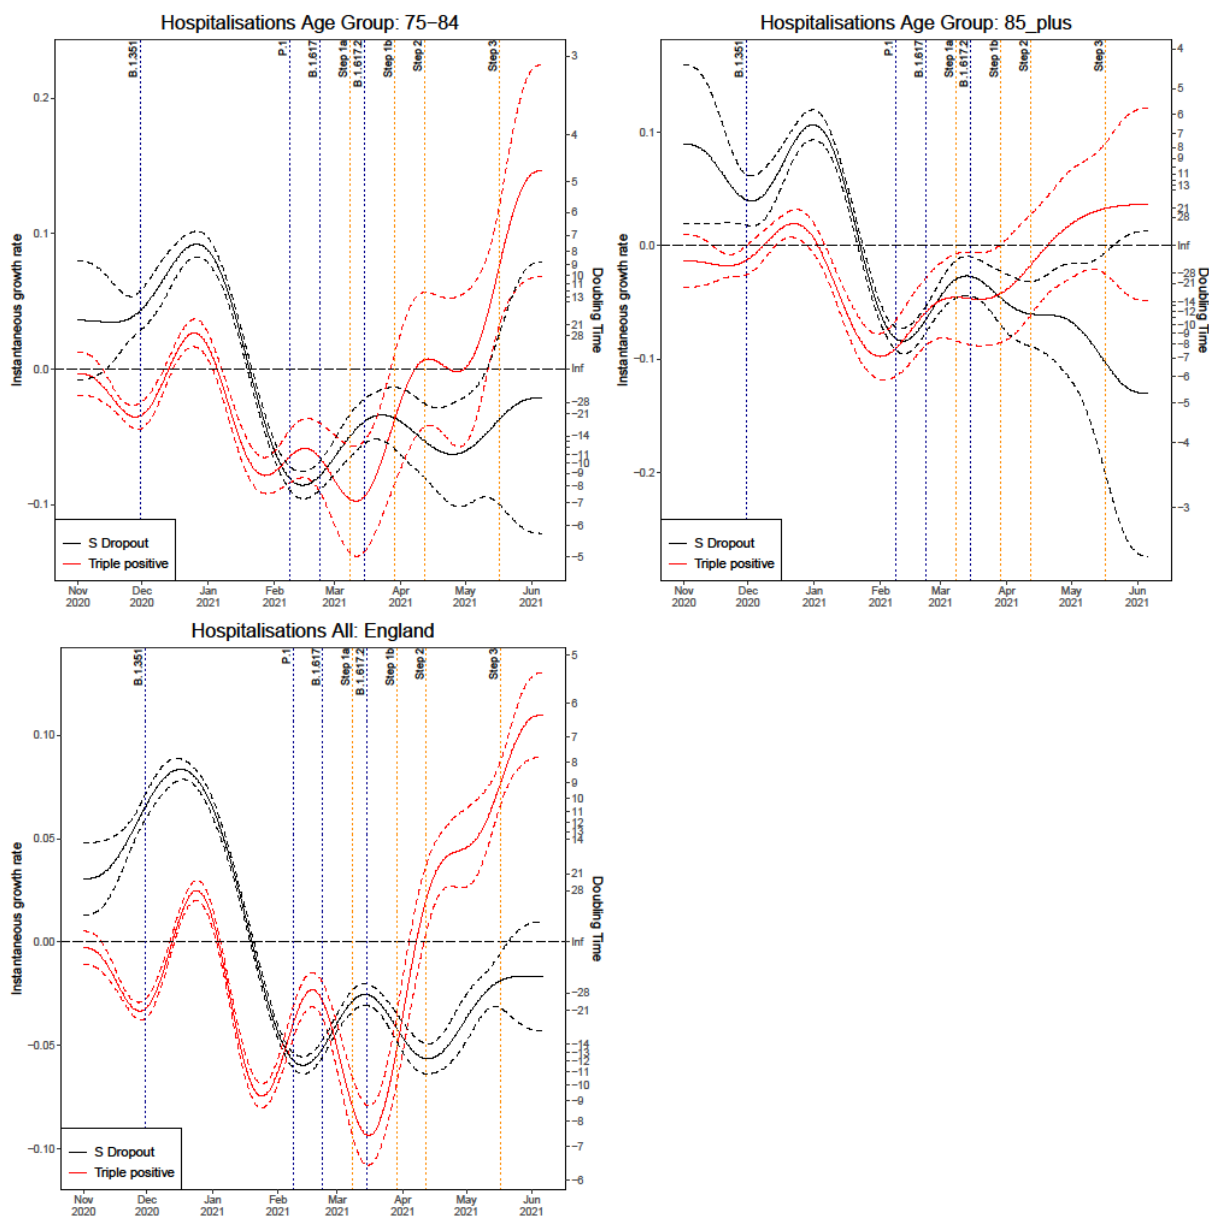

Appendix F: Hospitalisation Region

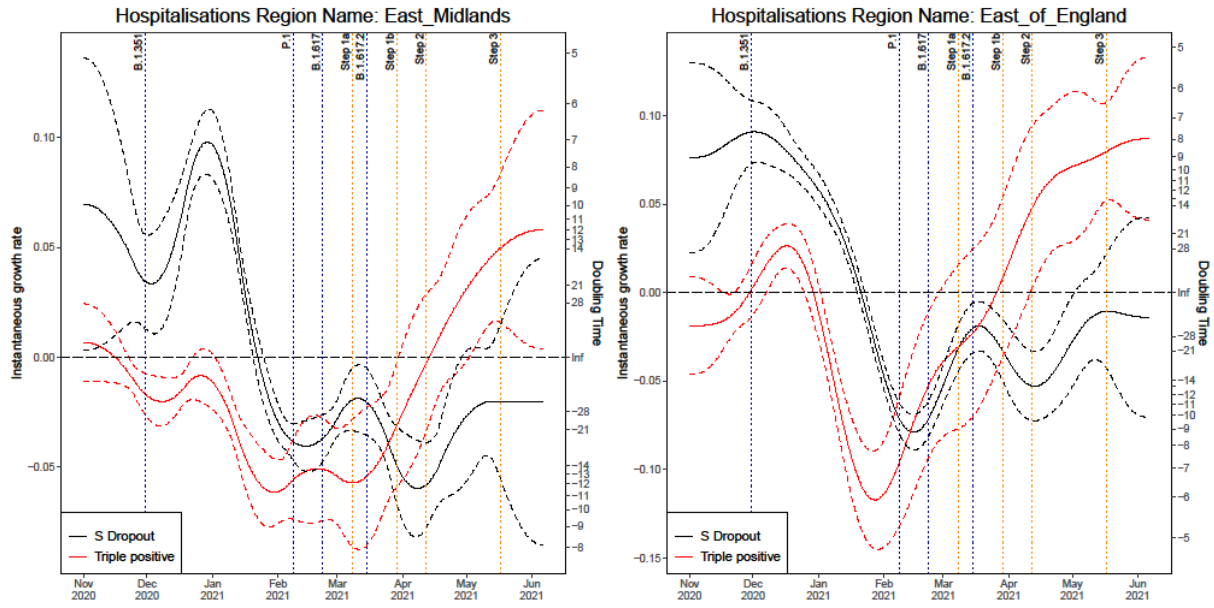

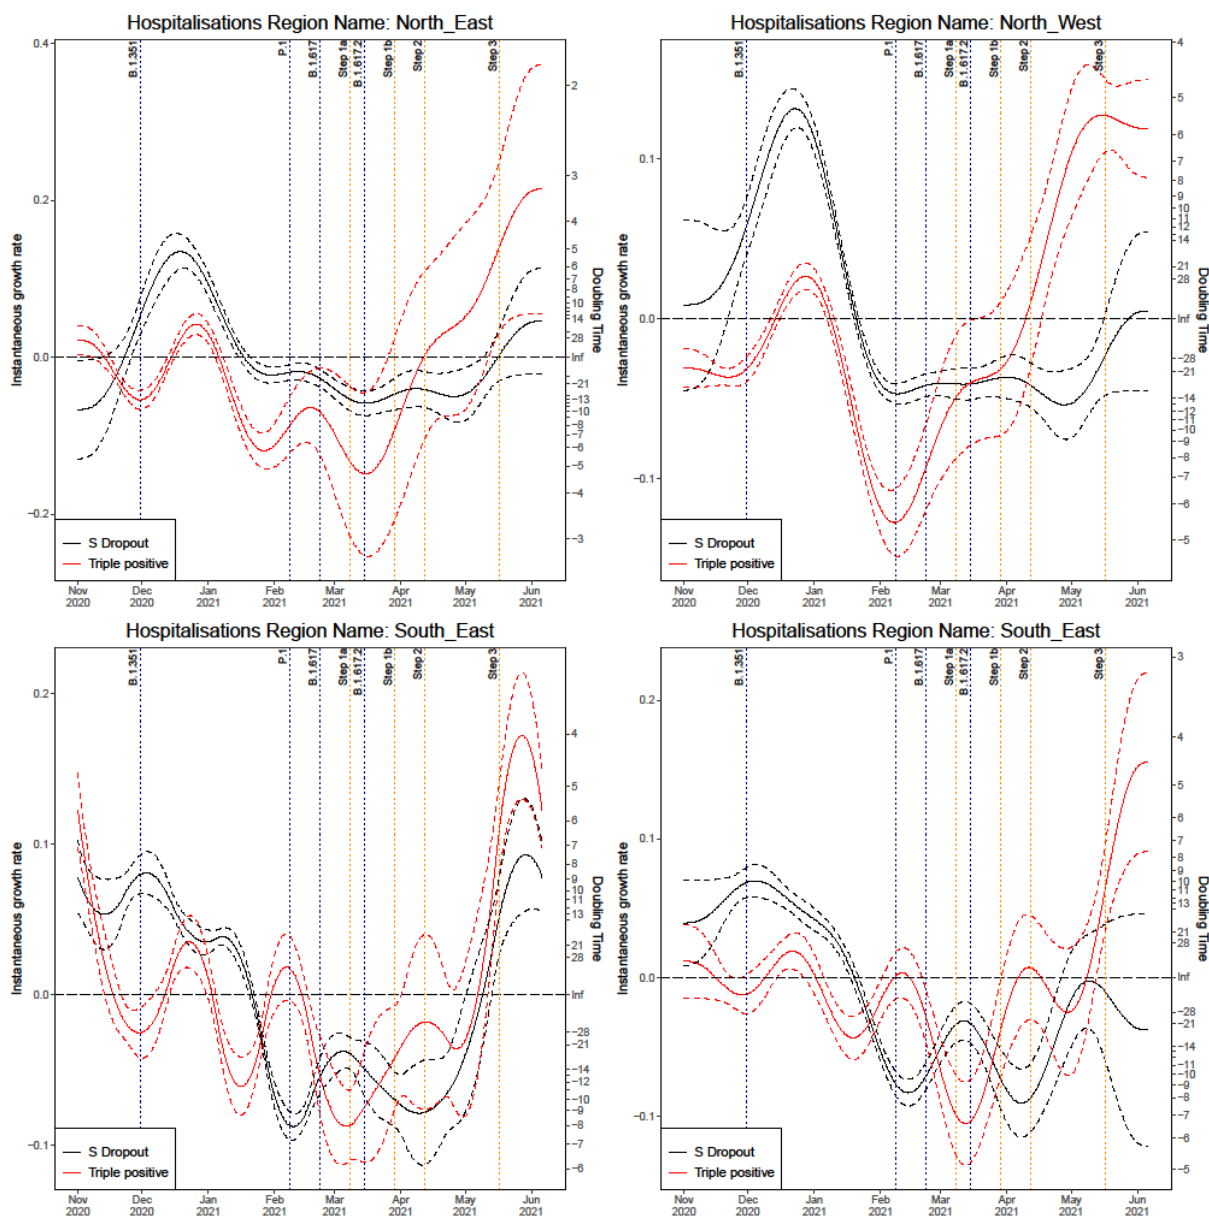



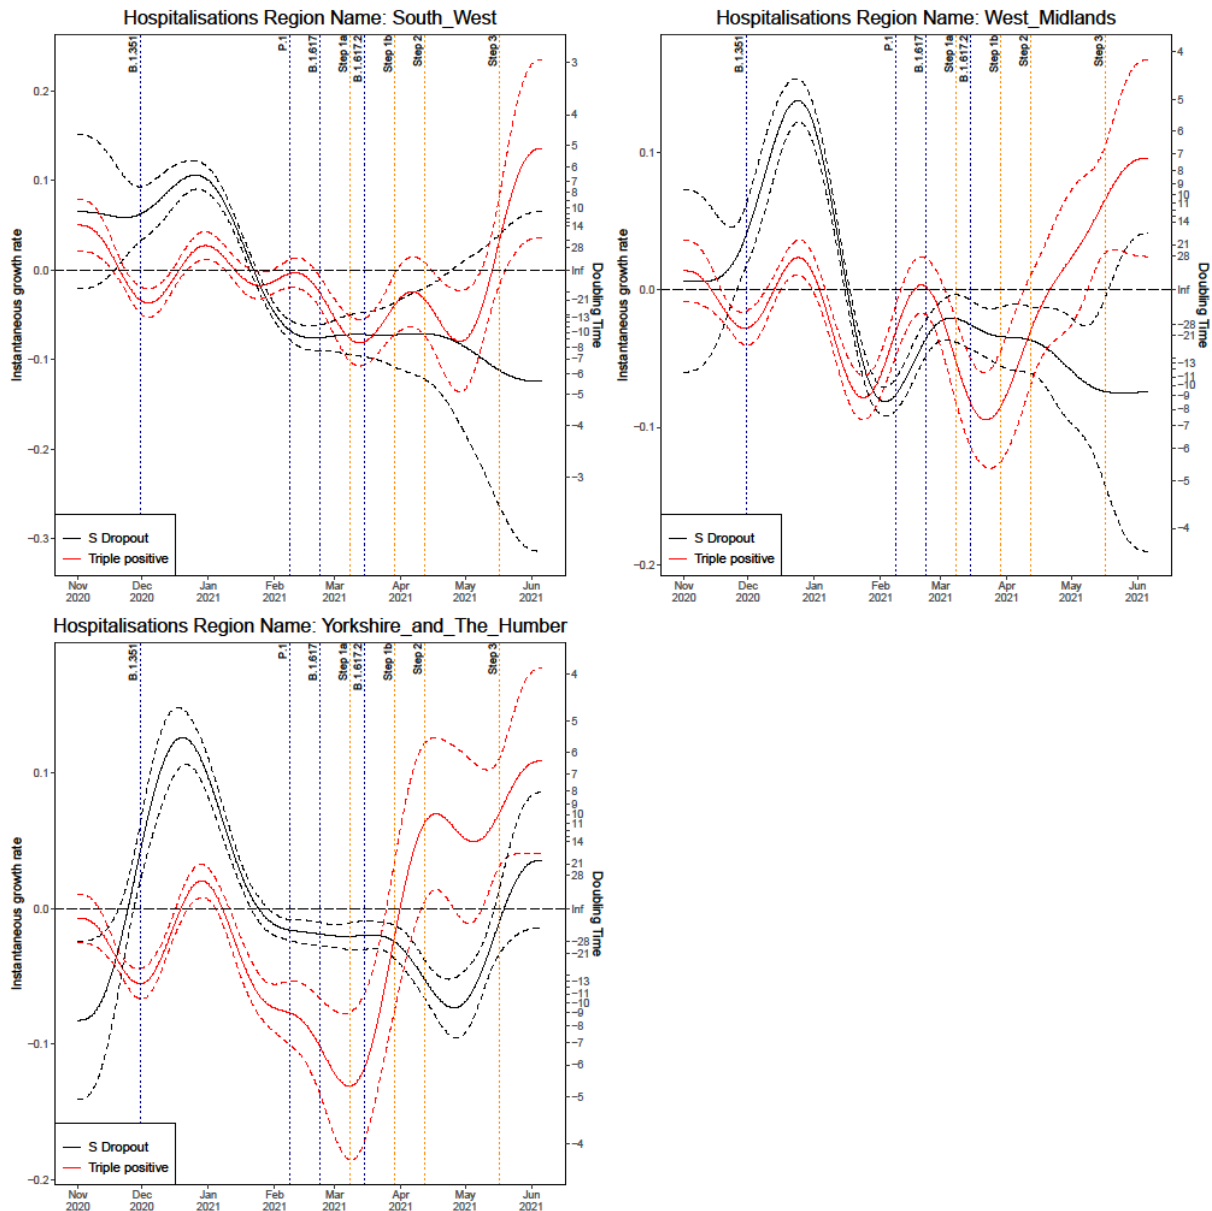

Appendix G: Hospitalisation LTLA

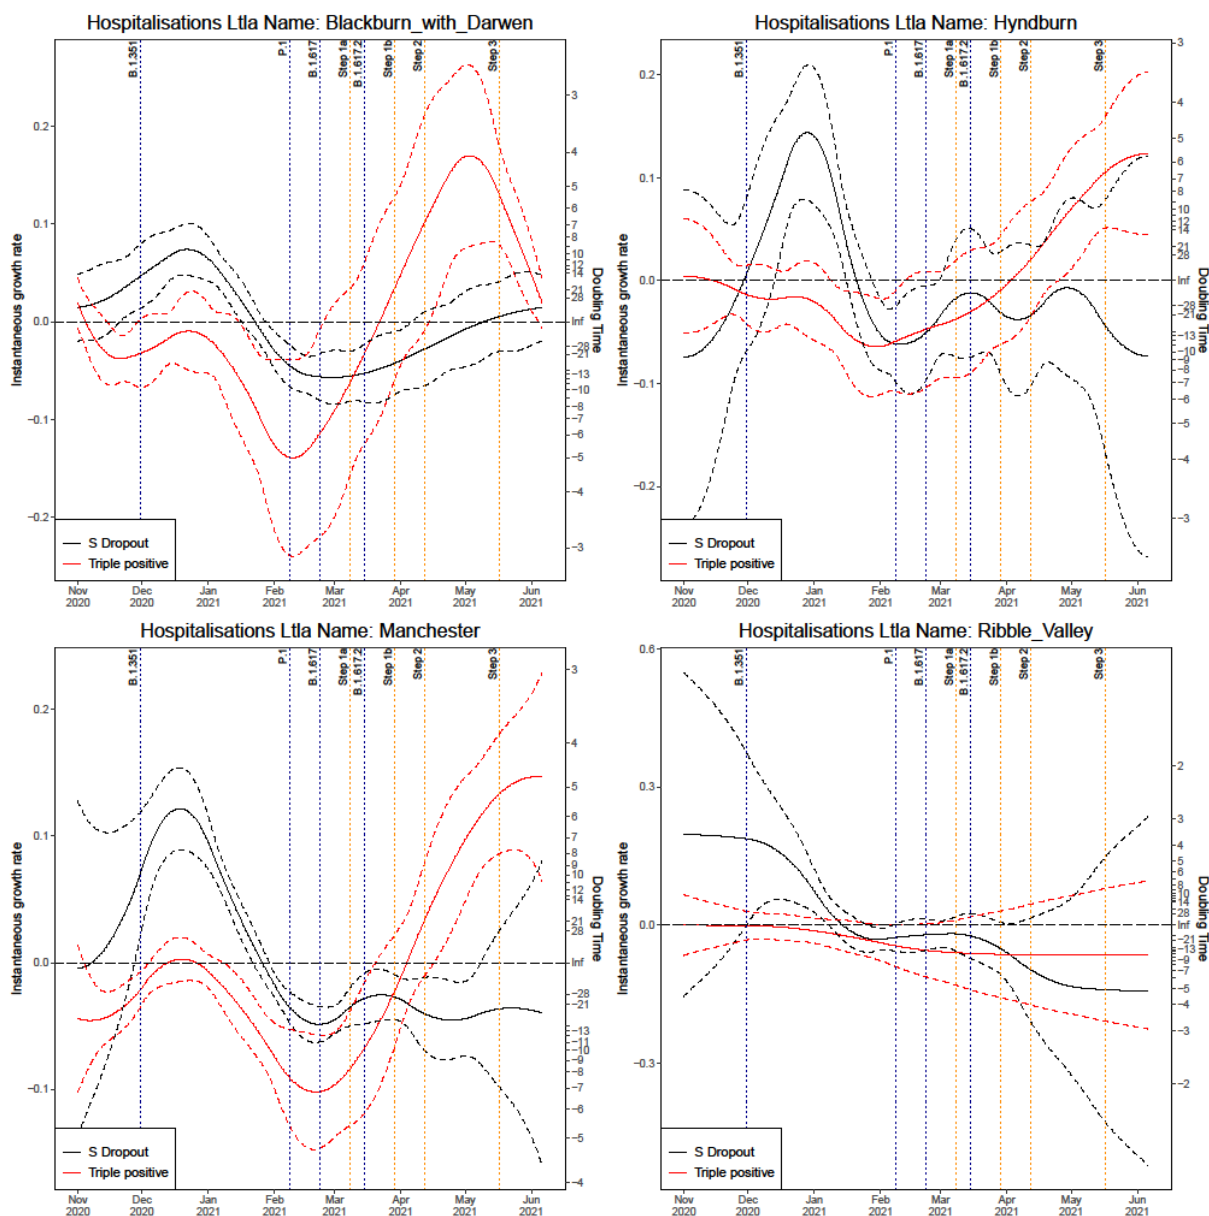

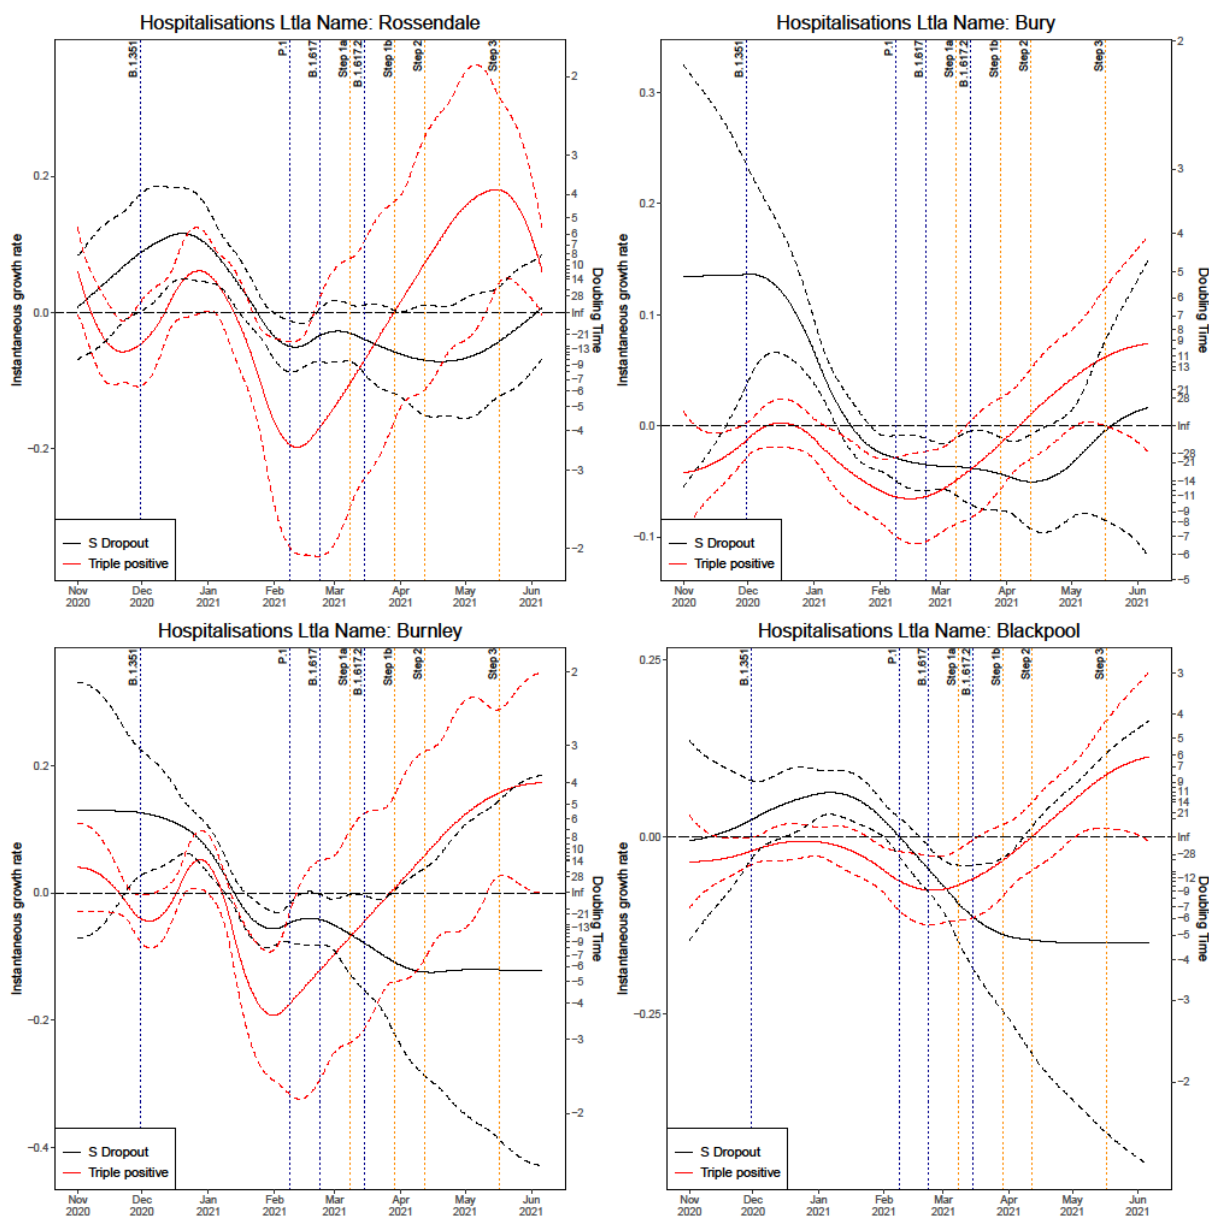

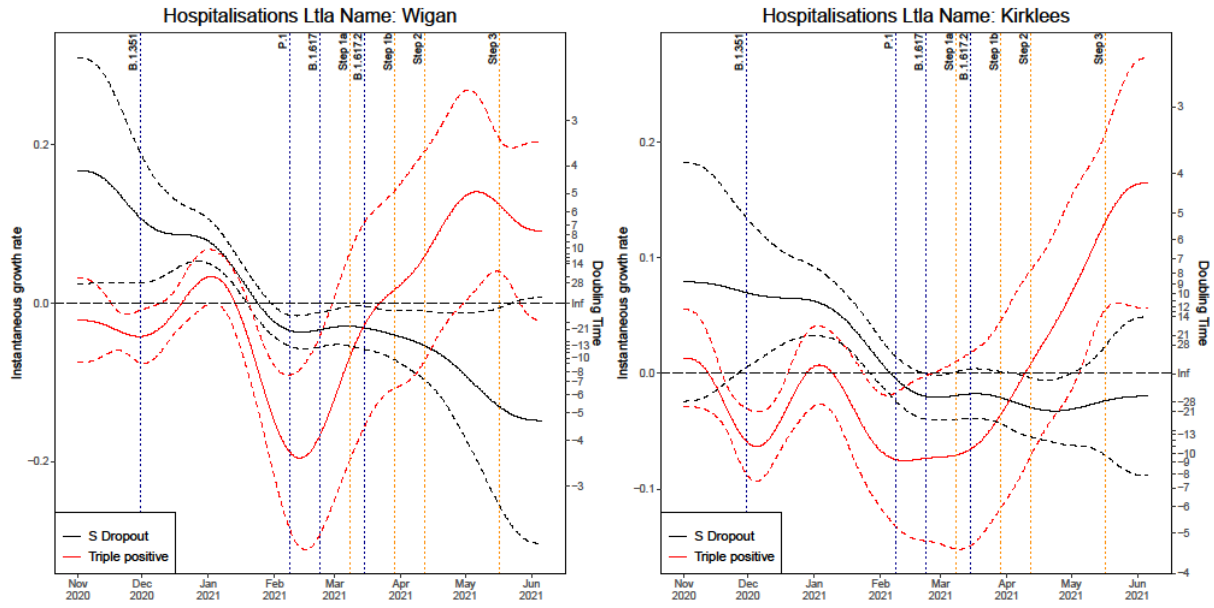

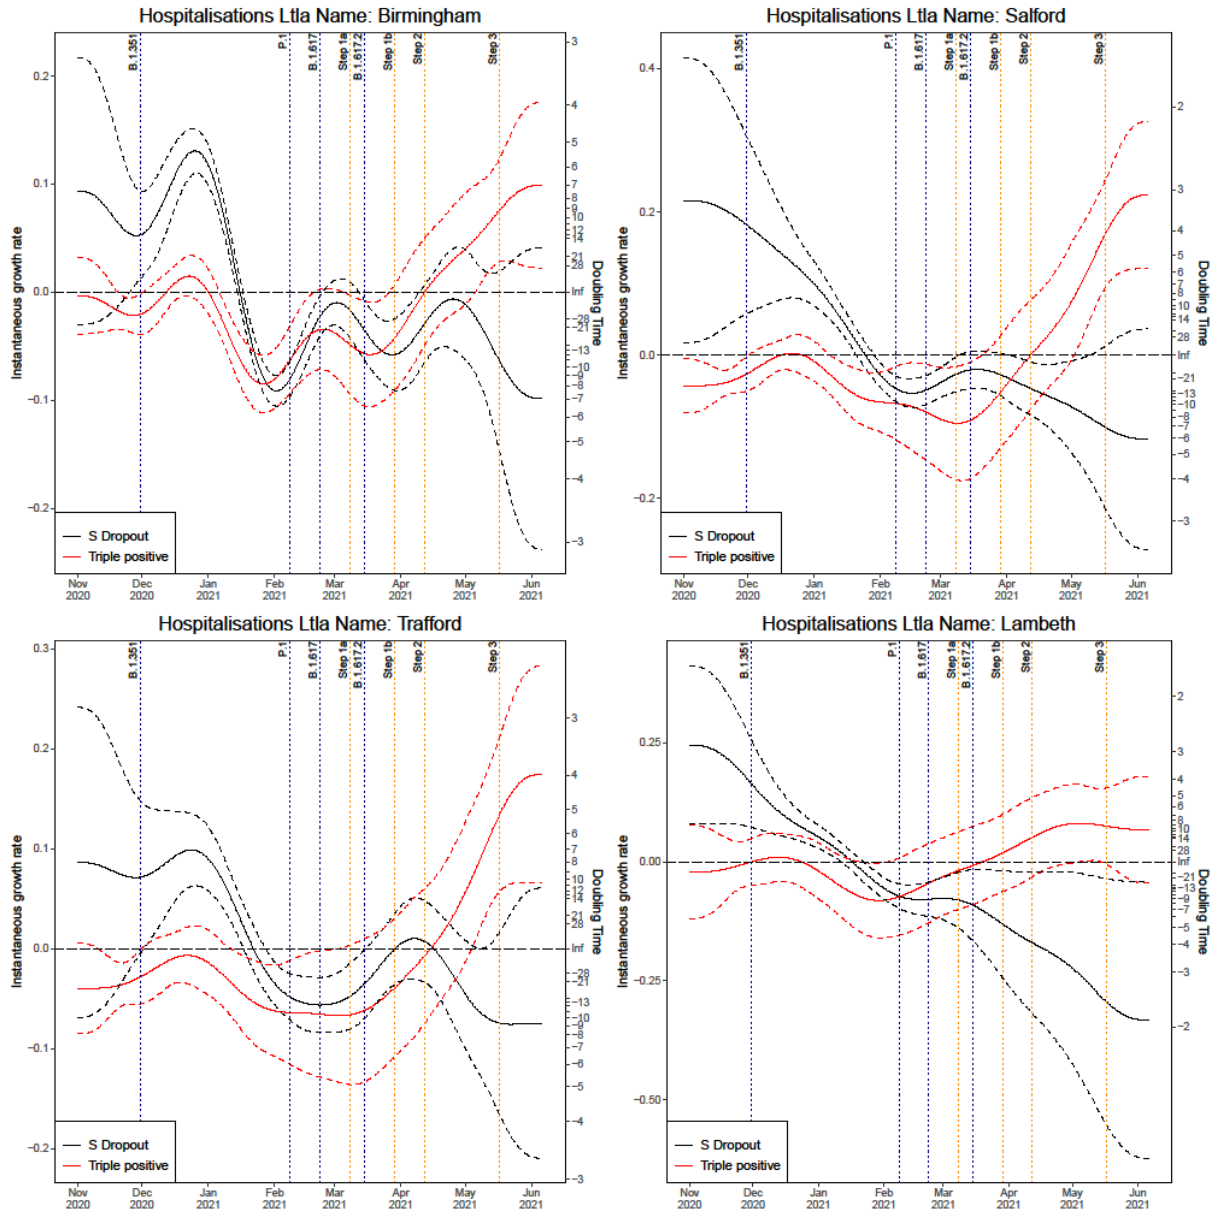

Appendix H

|  | SI mean | SI SD |
|--|---------|-------|
|  | 5.68    | 4.77  |
|  | 2.97    | 3.29  |
|  | 5.3     | 0.26  |
|  | 7.2     |       |
|  | 4.55    | 3.3   |
|  | 4.6     | 5.55  |
|  | 5.1     | 5.3   |
|  | 5.1     |       |
|  | 3.9     | 4.75  |
|  | 6.5     |       |
|  | 4.9     | 4.4   |
|  | 6.5     | 4.7   |
|  | 6.3     | 4.2   |
|  | 5.9     | 4.8   |
|  | 3.9     | 4.24  |
|  | 4.3     | 0.716 |
|  | 7.5     | 3.4   |
|  | 5.2     | 4.32  |
|  | 4.1     | 0.882 |

|      |         |       |
|------|---------|-------|
|      | 6.6     |       |
|      | 3.4     |       |
|      | 3.1     | 0.75  |
|      | 5.5     | 3.9   |
|      | 4.7     | 2.9   |
|      | 5.8     |       |
| Mean | 5.144   | 3.496 |
| SD   | 1.22657 | 1.659 |
| Min  | 2.97    | 0.26  |
| Max  | 7.5     | 5.55  |

## Appendix I

### Time from Symptom Onset to Specimen Date

| Start Date | End Date   | N     | Fit     | Mean    | SD      | Alpha    | Beta    | Loaic    | Waic     | Max Rhat | Min Rhat | Bad Pareto |
|------------|------------|-------|---------|---------|---------|----------|---------|----------|----------|----------|----------|------------|
| 01/01/2020 | 31/05/2020 | 557   | weibull | 3.66875 | 2.76983 | 1.34002  | 3.99321 | 2520.042 | 2519.159 | 1.00519  | 1.00089  | 0          |
| 01/06/2020 | 31/08/2020 | 4069  | weibull | 2.95717 | 2.39506 | 1.2423   | 3.17018 | 16859.34 | 16857.72 | 1.00025  | 0.999731 | 0          |
| 01/09/2020 | 30/09/2020 | 10000 | weibull | 2.6209  | 2.11027 | 1.24985  | 2.81378 | 39058.67 | 39055    | 1.00013  | 0.999542 | 0          |
| 01/10/2020 | 31/10/2020 | 10000 | weibull | 2.18193 | 2.05758 | 1.06113  | 2.2331  | 36226.77 | 36230.66 | 1.00124  | 0.99963  | 0          |
| 01/11/2020 | 30/11/2020 | 10000 | weibull | 1.97344 | 2.18076 | 0.906533 | 1.8826  | 34588.96 | 34602.01 | 1.00749  | 1.00303  | 0          |
| 01/12/2020 | 31/12/2020 | 10000 | weibull | 2.45101 | 2.17378 | 1.12993  | 2.56172 | 38238.76 | 38241.01 | 1.00077  | 1.00026  | 0          |
| 01/01/2021 | 31/01/2021 | 10000 | weibull | 2.07839 | 2.06587 | 1.00626  | 2.0836  | 35433.81 | 35439.34 | 1.00173  | 1.00054  | 0          |
| 01/02/2021 | 28/02/2021 | 10000 | weibull | 1.94196 | 2.00735 | 0.967796 | 1.91389 | 34250.36 | 34259.23 | 1.00184  | 0.999833 | 0          |
| 01/03/2021 | 31/03/2021 | 10000 | weibull | 1.96348 | 2.00263 | 0.98072  | 1.94674 | 34429.29 | 34437.08 | 1.00288  | 0.999865 | 0          |
| 01/04/2021 | 30/04/2021 | 10000 | weibull | 2.10586 | 2.06323 | 1.02091  | 2.12367 | 35648.06 | 35652.98 | 1.00075  | 0.999712 | 0          |
| 01/05/2021 | 31/05/2021 | 10000 | weibull | 2.01347 | 2.07044 | 0.972811 | 1.98905 | 34898.79 | 34906.32 | 1.00235  | 1.00046  | 0          |
